# Supplementary material for: Predator Cat Odors Activate Sexual Arousal Pathways in Brains of Toxoplasma gondii Infected Rats
Source: PubMed Central journal article supplement (PMC3157360; doi:10.1371/journal.pone.0023277), 2011-08-17
Supplement: pone.0023277.s002.pdf [file pone.0023277.s002.pdf]

| Region                            | Cat odor<br>Uninfected<br>(n = 9) | Female odor<br>Uninfected<br>(n = 9) | Cat odor<br><i>Toxoplasma</i><br>(n = 9) | Female Odor<br><i>Toxoplasma</i><br>(n = 9) |
|-----------------------------------|-----------------------------------|--------------------------------------|------------------------------------------|---------------------------------------------|
| Lateral Amygdala                  |                                   |                                      |                                          |                                             |
| 1. LAdl (dorsolateral)            | 0 ± 0                             | 1 ± 1                                | 6 ± 2 *                                  | 4 ± 3                                       |
| 2. LAVm (ventromedial)            | 15 ± 7                            | 22 ± 6                               | 15 ± 6                                   | 41 ± 8 #                                    |
| 3. LAVl (ventrolateral)           | 3 ± 1                             | 10 ± 3 *                             | 0 ± 0                                    | 20 ± 7                                      |
| Basolateral Amygdala              |                                   |                                      |                                          |                                             |
| 4. BLA (anterior)                 | 41 ± 2                            | 39 ± 5                               | 54 ± 6 *                                 | 74 ± 8 #                                    |
| 5. BLP (posterior)                | 5 ± 2                             | 5 ± 2                                | 4 ± 2                                    | 6 ± 2                                       |
| Medial amygdaloid nucleus         |                                   |                                      |                                          |                                             |
| 6. MEApd (posterodorsal)          | 28 ± 5                            | 53 ± 6 *                             | 58 ± 11 *                                | 74 ± 8                                      |
| 7. MEApv (posteroventral)         | 57 ± 10                           | 43 ± 8                               | 57 ± 11                                  | 51 ± 12                                     |
| Ventromedial hypothalamic nucleus |                                   |                                      |                                          |                                             |
| 8. VMHdm (dorsomedial)            | 27 ± 4                            | 11 ± 3 *                             | 66 ± 11 *                                | 34 ± 8 #                                    |
| 9. VMHvl (ventrolateral)          | 56 ± 15                           | 73 ± 5                               | 35 ± 10                                  | 54 ± 10                                     |

Independent-samples T Test: \* indicates  $P < 0.05$  relative to Cat Odor Uninfected group; # indicates  $P < .05$  relative to Female Odor Uninfected group
